# Supplementary material for: Scalable synthesis of CuInS2nanocrystal inks for photovoltaic applications
Source: Royal Society of Chemistry journal article supplement (doi:10.1039/c4ta05696e), 2015-01-01
Supplement: c4ta05696e1.pdf [file c4ta05696e1.pdf]

## Electronic Supporting Information

### Scalable synthesis of $\text{CuInS}_2$ nanocrystal inks for photovoltaic applications

P. Niyamakom,<sup>a</sup> A. Quintilla,<sup>#b</sup> K. Köhler,<sup>a</sup> M. Cemernjak,<sup>b</sup> E. Ahlswede<sup>\*b</sup> and S. Roggan<sup>\*a</sup>

<sup>a</sup> Bayer Technology Services GmbH, D-51368 Leverkusen, Germany. Fax: +49-214-30-81118; Tel: +49-214-30-20053; E-mail: stefan.roggan@bayer.com.

<sup>b</sup> Zentrum für Sonnenenergie- und Wasserstoff-Forschung Baden-Württemberg (ZSW), D-70565 Stuttgart, Germany. Fax: +49-711-7870-230; Tel: +49-711-7870-0; E-mail: erik.ahlswede@zsw-bw.de

# present address: Karlsruhe Institute of Technology (KIT), D-76131 Karlsruhe, Germany.

#### 1. TEM analyses of $\text{CuInS}_2$ samples obtained after different reaction times

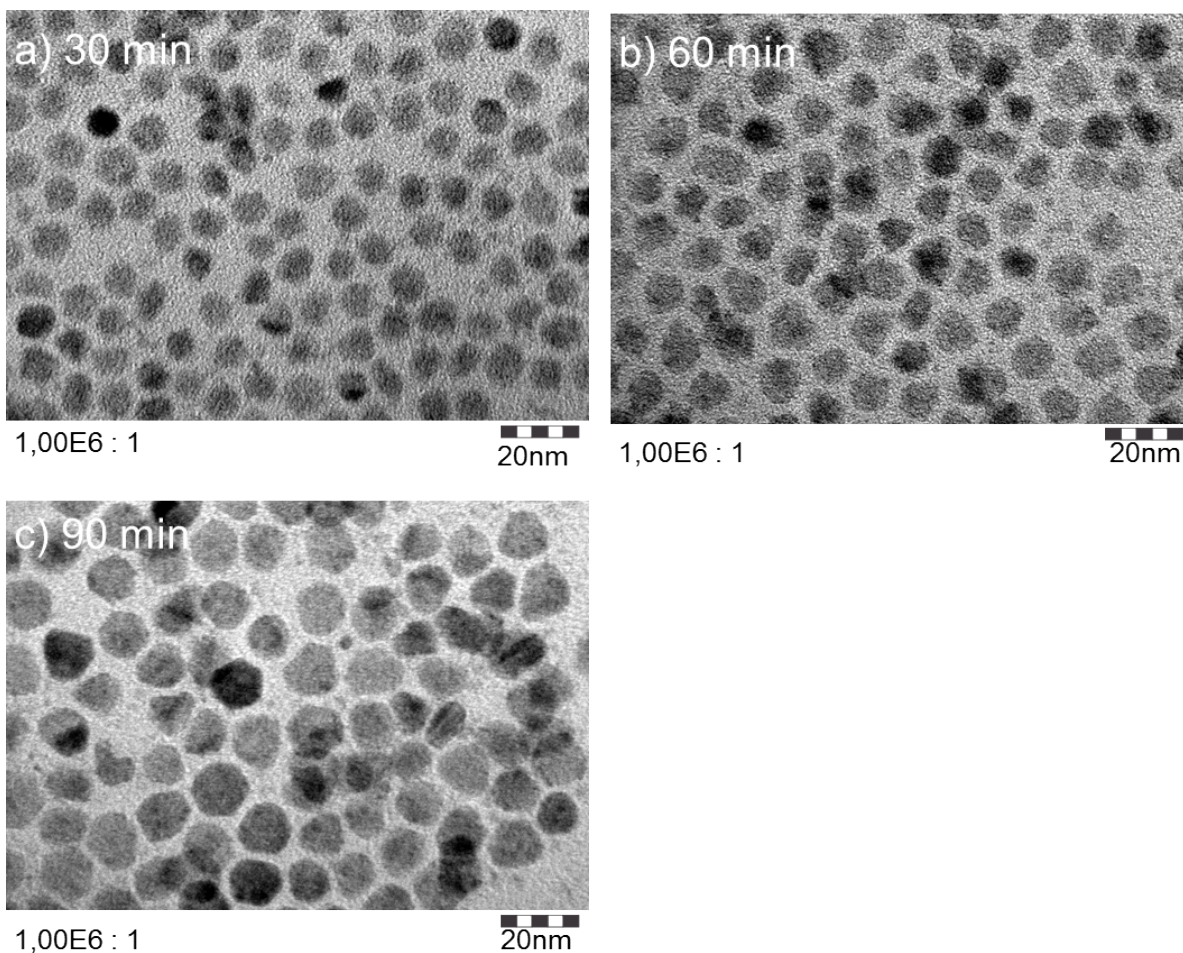

Figure S1: TEM analyses of samples obtained after different reaction times (a: 30 min, b: 60 min, c: 90 min; see main article for related TEM images taken after 1, 5 and 15 min reaction time).

## 2. HRTEM analysis of $\text{CuInS}_2$ nanoparticles

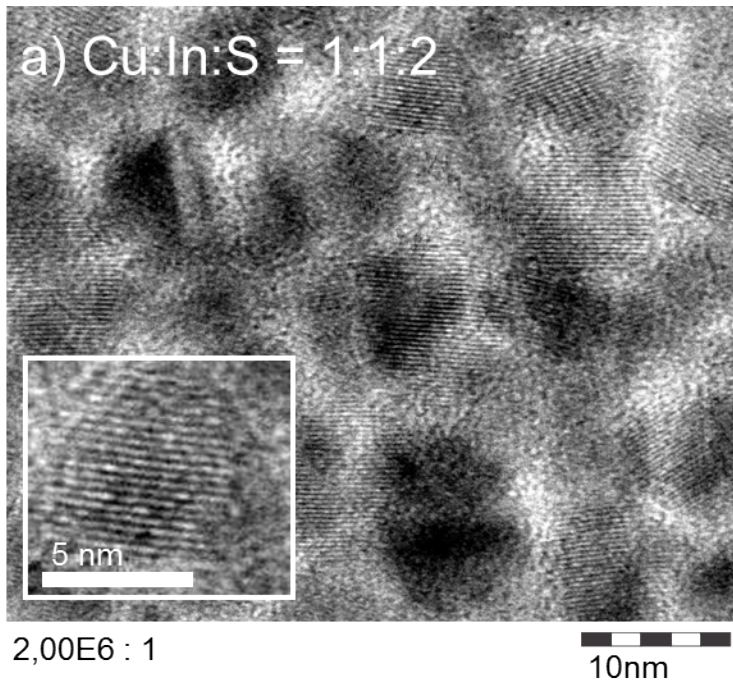

Figure S2: HRTEM analysis of  $\text{CuInS}_2$  sample prepared with  $\text{Cu:In:S} = 1:1:2$  precursor ratio. The observed spacing  $d = 3.2 \text{ \AA}$  corresponds to the (112) lattice planes of tetragonal (chalcopyrite)  $\text{CuInS}_2$ .

## 3. Size distribution of $\text{CuInS}_2$ nanoparticles obtained at 11g scale

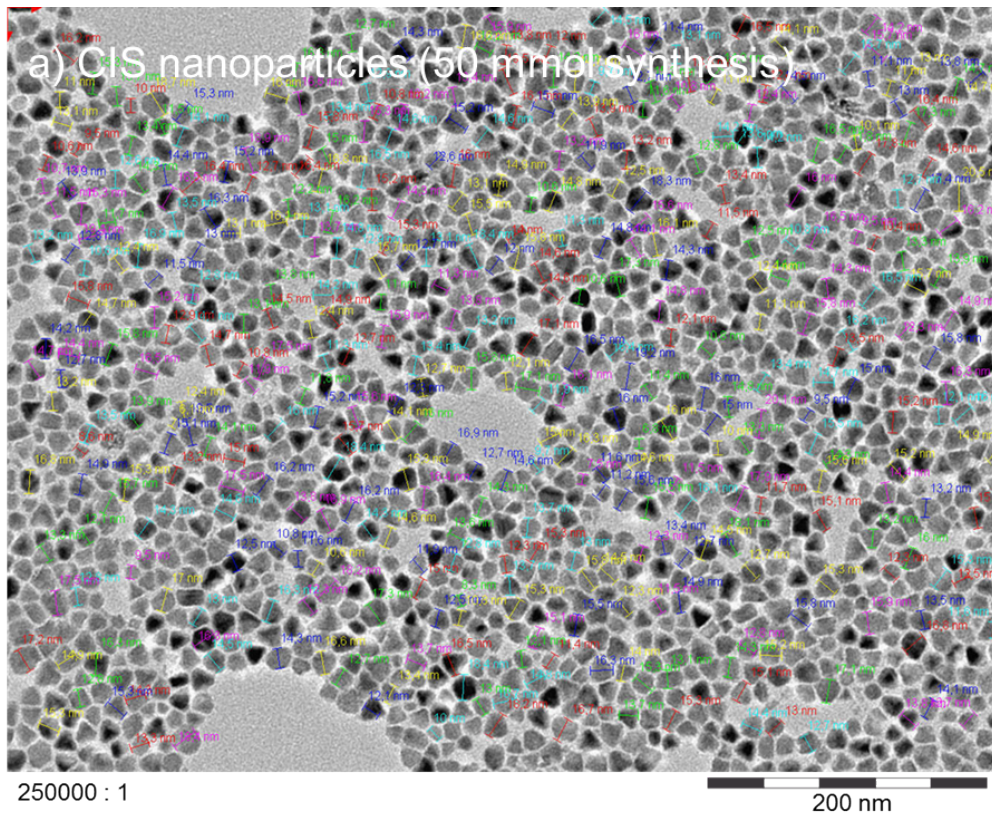

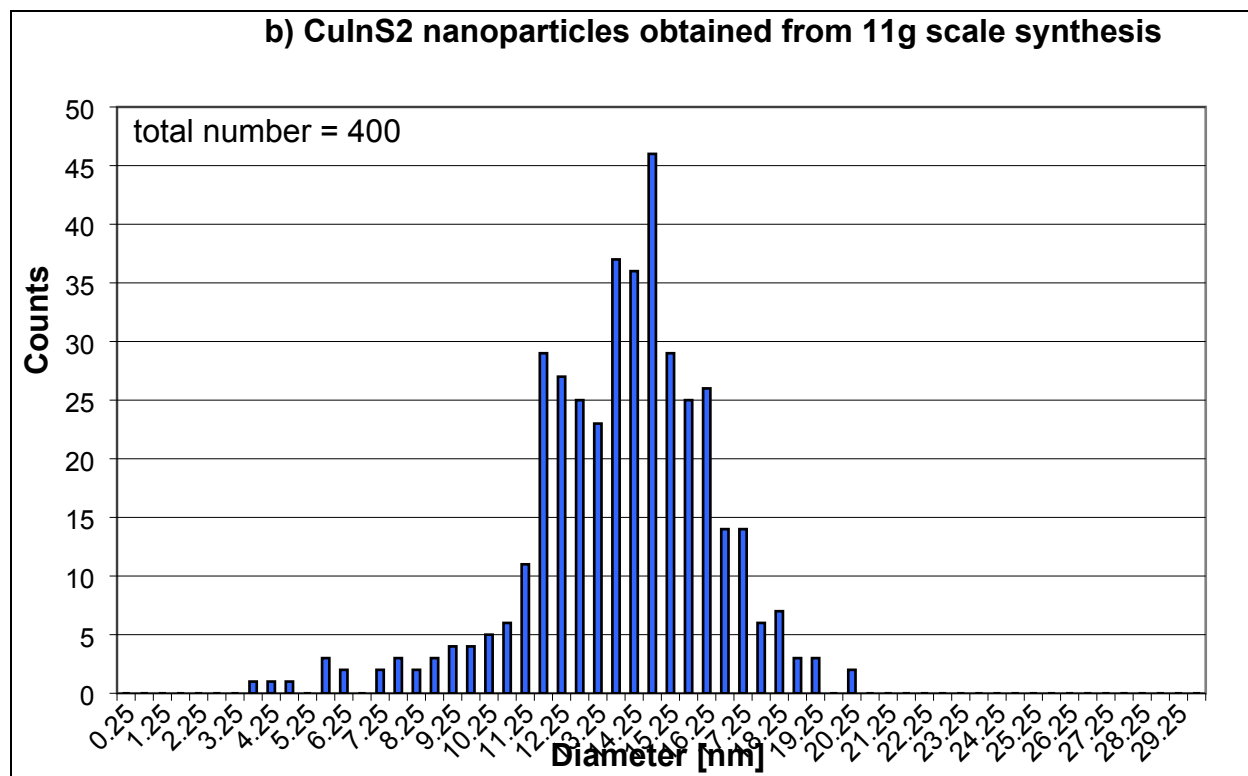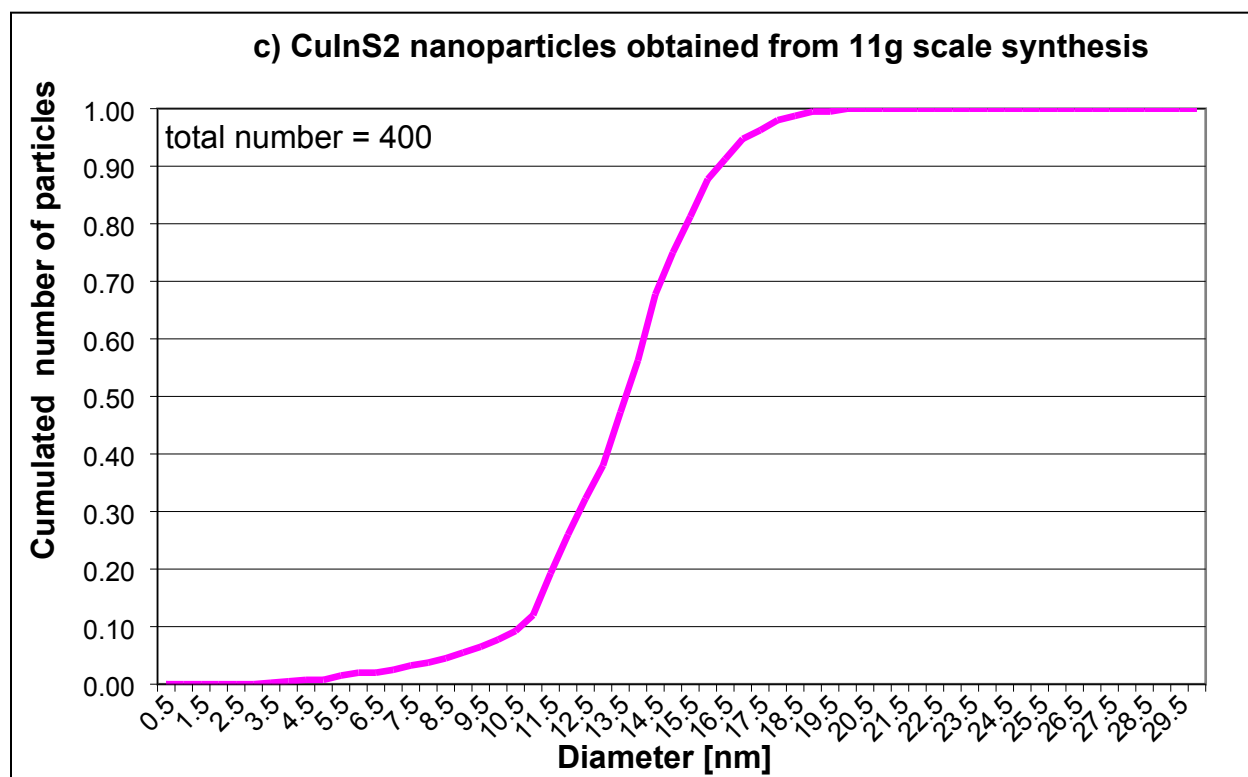

Figure S3: Size distribution of CIS nanoparticles obtained at 11g scale (see also Figure 3 in main article). a) TEM image showing the typical particle shapes and sizes, b) distribution of the diameter, and c) cumulated number of particles at different diameters.

#### 4. Effect of surface ligand exchange from oleylamine to pyridine:

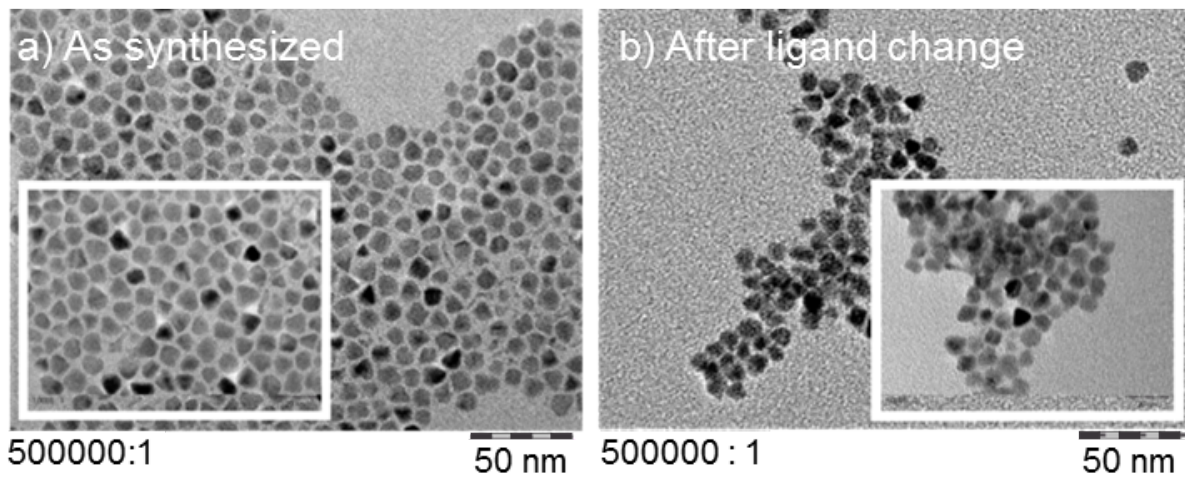

Figure S4: TEM analyses of samples obtained directly after synthesis (a) and after ligand exchange (b) from oleylamine to pyridine. The nanoparticles are in closer contact after surface modification, which hints at a successful exchange of long chain oleylamine surface ligand by pyridine.
